# Supplementary material for: Efficacy of adjuvant chemotherapy for non-small cell lung cancer assessed by metastatic potential associated with ACTN4
Source: PubMed Central journal article supplement (PMC5078083; doi:10.18632/oncotarget.8890), 2016-04-21
Supplement: oncotarget-07-33165-s001.pdf [file oncotarget-07-33165-s001.pdf]

SUPPLEMENTARY FIGURE

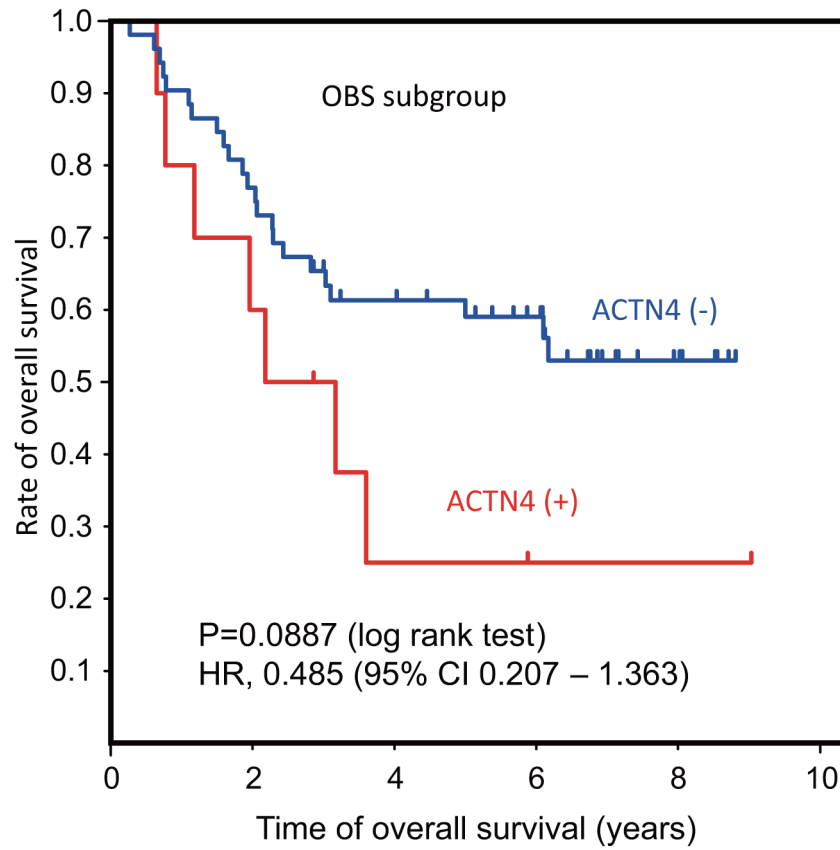

Supplementary Figure S1: Kaplan Meier curves of overall survival were constructed for OBS subgroup. ACTN4 (-) (blue line) and ACTN4 (+) (red line).
